# Supplementary material for: Medium-scale gravity waves observational methodology for antarctic airglow observations
Source: Copernicus journal article supplement (doi:10.5194/egusphere-2024-3344), 2024-12-02
Supplement: Supplementary file [file egusphere-2024-3344-AC2-supplement.pdf]

Authors' response to Referee 2:  
Gabriel Giongo et al.

The authors thank the referee for reviewing the paper. All comments are relevant, and the suggestions are very useful in improving the final version of the paper. Replies to all the comments are addressed below.

Reviewer comments in black, [author's comments in blue](#).

## Overview

This manuscript introduces an improved method for detecting medium-scale gravity waves from ground-based airglow imagers. The method is based on keogram analysis, it is designed to automatically detect wave events and determine the horizontal wavelength, azimuth, period and ground-based phase velocity of the waves. It was tested using simulated data as well as actual airglow images. Authors report reliable wave identification and low errors of the retrieved wave parameters.

Unfortunately, the new methods, although they seem to contain good ideas for dealing with many aspects of the problem, are not explained clearly enough, to the point that I had difficulties interpreting some of the main results (see major comments below). I have also outlined some possible issues with the method itself and made a few suggestions, I hope they can be of some use. Since introduction of the improved methodology is the main goal of this paper, I cannot recommend it for publication in its current state.

[In general, we modified much of the text, completely rewrote many parts, and added a subsection for an overview of the methodology and the mathematical concepts and physical meanings associated with them. This overview is provided before demonstrating performance in synthetic images and then in the real keograms, highlighting the problems and discussing them. Additionally, the error retrieval by the simulation methods is in its own section, and the discussion section presents results from the previous methodology and more clearly points out the improvements brought by the newly developed methodology. Furthermore, we proposed a new title to emphasize the paper's contribution to the current spectral analysis of gravity waves. The figures have been enhanced with clearer plots and legends.](#)

## General/major comments

**1. Severe lack of clarity in mathematical methodology and result presentation.** This manuscript cites quite a few previous works in relation to various methods used in wave analysis and error estimation. While it is the accepted norm for derivations of those results and their finer detail, the authors of this manuscript rely solely on the references and very general methodological concepts (e.g. "error propagation") to describe the key quantitative parameters and mathematical methods used in their work. Because of this, I had difficulty understanding which physical or statistical quantities are described by the provided numerical values. Some of the most important results are presented in figures with undefined color scales, or as a percentage of an unstated quantity or as a standard deviation, without a clear a description of the data set for which the standard deviation was calculated (see major comment 2 and specific comments for concrete examples). I must apologize if I overlooked something or if some of the subsequent comments are simply a result of me interpreting some physical quantity not in the way that the authors intended, but, in my opinion, reader should not need to guess quite so often.

In the new version of the text, all mathematical concepts and the presentation of results were rewritten for improved clarity. Figures, along with their legends and tables, were updated. More details were added to the methods and the rationale behind their use. In the new version, we aimed to enhance clarity even for those not in the field.

**2. Simulated keogram analysis results.** The authors mention “error propagation” in several places in the manuscript. For example, they state that “It is important to emphasize that this study is not trying to validate the wavelet transform or other well-known mathematical procedures, like linear fitting. Still, it tracks errors throughout the combination of processes employed. Errors due to any transform or mathematical procedure exist and can be studied or found in other publications (Liu et al., 2007; Xu et al., 2024).” This leads me to believe that quantities described as “propagated errors” are simply a result of statistical errors of well-known data analysis procedures (e.g. linear fitting, wavelet analysis) combined using the standard methods of calculating the error of a derived quantity from the errors of the parameters the quantity was derived from. On the other hand, running the analysis on simulated data provides an independent method of estimating the error: one can simply compare the results of analysis to the known parameters of the simulated data. Therefore:

(a) I do not understand what authors mean in the beginning of Section 3, when they state that “Artificial images made as arrays containing known wave patterns were used to verify the quality of the analysis, track the error propagation through the procedure, and estimate future errors generated throughout the process”. Does this mean that the error estimates for real data run (i.e. “propagated error”) was somehow based on the results of the simulated data run? If yes, then how? Was the simulated data used only for setting the threshold for acceptable linear phase fits, or for something else?

The simulations are used for error estimation due to the procedure, so what we call error propagation is simply the difference between the results and the input values. They also provided insights into how errors are generated throughout the procedure and how the superposition of waves can influence these errors. We acknowledge the mistake here; for the real keograms, the deviations mentioned in Table 1 reflect the standard deviations of the parameters estimated as an average of multiple phase line selections. For simulations, only one phase line is necessary. As the new text alters the order of the descriptions, we now mention that we take an average parameter in the real keograms from the phase lines, as it is essential to monitor the wave presence over time. Section 3 (lines 219-248) is an updated text with the description of the average parameters for real keograms, and Section 4 (lines 250-294) is for the latest description of error propagation throughout the procedure.

(b) Authors only provide one example of a simulated keogram, while “more than 800” were used in total. More information on this keogram set should be provided. Did every simulated keogram have two waves in it? What were the wavelengths and periods? What were the relative amplitudes?

The new text version provided details about the data set used in the simulations, including wavelengths, periods, and amplitudes (please see lines 258-265). The consequences of the waves' superposition on the phase signal were also demonstrated to illustrate the problems better and facilitate further discussions (lines 266-273).

(c) (Important!) Table 2 is extremely confusing. Firstly, I have no idea what the “standard deviation” means here. I did not find an explanation anywhere in the main text. Variance of the linear fit for phase is discussed in detail in this section, but it is not clear how it would be

used to obtain the standard deviations for all the measured parameters. Are these just the standard deviations of the parameters used for all the different simulated waves? Secondly, what kind of error estimates are given in the table? Since this is a test on simulated data, it is vital to provide a clear overview of how wave analysis results compare to the actual parameters of simulated waves. Yet the table suggests that this is “propagated error”. If this is just the propagated error in the sense I defined it at the beginning of this comment, what was the point of the simulated data run and why are the authors not showing how the analysis results compare to the actual wave parameters? If Table 2 does indeed show this comparison, then how do these errors compare to the errors provided for the real keograms (which are the “propagated errors”, right?), where the wave parameters were not known in advance?

Table 2 summarizes Figure 9 (old version). It displays the distribution of errors as a function of variance. We calculated the mean value and standard deviation of this mean. Every distribution can have a mean, standard deviation, skewness, and kurtosis, which are referred to as statistical moments. We summarize the simulation results in the table: errors throughout the procedure and the threshold used to limit those errors. This emphasizes the low error propagation in the methodology, alongside other errors that may arise from actual keograms, which are discussed adequately in the new text version. We hope the new text version clarifies the statistical concepts and the discussion regarding error estimations and parameter errors.

### **3. Collocation of zonal and meridional wavelength estimates.**

(a) As one can see from figures 4 and 5, the wavelengths can end up being retrieved from a part of keogram that does not include the center (zenith) pixel. This can lead to a situation when zonal and meridional wavelengths are retrieved from completely disjoint parts of the image, neither of which contain the zenith pixel (which is used to identify temporal peaks in wave activity). In my opinion, this is a major flaw of the method. Many structures seen, for example, in Figure 4, do not span the whole spatial extent of the keogram: there are major differences in phase structure and phase tilt between North and South, as well as East and West, parts of the image. Therefore, I would assume that method would often estimate the meridional and zonal wavelengths of completely different wave packets. The authors also seem to be aware of this: they state in Section 5 that waves not spanning entire keogram are a problem and that “The resulting period can be closer to one wave while the resulting wavelength is closer to another”. It is therefore hard for me to understand why so little care is taken to ensure the collocation of both wavelength estimations and the wave activity peak identification. Point (b) outlines one possible way to resolve that, just as an example.

This is indeed a significant issue concerning the keogram technique, and many previous analytical methods have failed to address the problem. Since the earlier methods were manually oriented, the operator had to be cautious when selecting the same wave packet in both components of the keogram. Our central assumption is that the wave has a large scale, allowing it to traverse a significant portion of the images and persist over time. Small-scale waves more frequently pass through only a portion of the image, while it is rarer for medium-scale waves to do so. In our method, we could avoid the “non-zenith” waves by preventing the program from selecting the best-fitting region near the edges of the keogram. However, we chose not to do this and instead rely on further validation through human approval, which is one reason we maintained visual validation (Major comment 4). Differences in phase tilt between components are expected, as the inclination is proportional to the wavelength projected in that direction. It is entirely possible that the wave lacks a component in that

direction. The potential for a wave to have the parameters of another was observed in the simulations and is shown in more detail in lines 266-273.

(b) As far as I understand, the method described in the manuscript only makes use of one row and one column from each image. Furthermore, the peaks of wave activity are only identified from a time series obtained from a single pixel. It seems to me, that a simple way to improve the method would be to pick a few (let us denote their number by  $n$ ) equally spaced rows and the same number equally spaced columns in the image. Then one would apply the wavelet power spectrum analysis not just for the zenith pixel, but for the  $n^2$  intersections of rows and columns. The strongest peaks in these power spectra could then be used to identify wave events, and wavelengths could be estimated from the meridional and zonal keograms that intersect at the point with a strong power peak. This way, wave events that happen off-zenith could be identified. Even more importantly, one could apply stricter colocation criteria for phase fitting (e.g. only use the parts of the two keograms that contain their intersection point, where the power spectrum peak was identified) without losing too many wave events. Finally, if this method ends up detecting waves in close spatial and temporal proximity to one another, one could use this as a consistency check. As far as I understand, none of the methods described in this manuscript are very computationally expensive, so it should not be a problem to run this for  $n = 5$ , for example. There could be, of course, many more (and probably better) ways to resolve the colocation problems and make better use of data from the whole image.

You understood right. Your suggestion is good and we thank you for trying to help us. Our group already did the keograms made with the lines (and columns) out of the center, and no practical consequences were verified. Also, we tried the cross-spectra of the Fourier (and wavelet) from lines in a similar way you suggested. Cross-spectra indicate the wave modes present in both spectra, so we do not need to check “the strongest peaks in these power spectra”, as the spectrum does not show power if the mode is absent in one of the series. Other problems arise, like the Milky Way signal breaking the wave modes as it is stronger and present everywhere in the keogram; and we have doubled results for the same wave, making it much worse to check after the end of a procedure or add another ad hoc parameter. As in the previous point, we highlight that the waves are large and slow enough to pass through the zenith for a considerable time to be analyzed reliably by keograms. Discussion on this point was inserted in the text and can be checked at lines 352-357.

**4. The need for manual intervention.** In the beginning of Section 2.2 the authors state “Although the procedure is based on Fourier Transform as in previous works, the new feature of this methodology is that it automatically selects the waves along the keogram and verifies the quality of the oscillatory signal, resulting in less user bias on its usage”. Therefore, the automatic nature of the new analysis method is the key novel aspect in this work. However, Section 5 implies that some of the most important flaws of the method could be addressed by manual inspection of results. In particular, phase lines of valid wave fits “can be bent but not tortuous, which is a consequence of a close superposition of the waves.”. In my understanding, distinguishing a “tortuous” phase line from a bent one should not be too difficult to accomplish automatically: one could consider, for example, checking whether some norm (e.g. the Euclidean norm) of the second temporal derivative of the phase line exceeds a threshold. That would, of course, introduce another ad-hoc parameter to the analysis (besides the currently used threshold for the variance of linear fit), but this would still be more objective than manual inspection of results, that the authors have set out to avoid. Also, was any manual selection of wave fits used to obtain any of the results shown in the manuscript?

All the procedures are fully automated; we simply conduct a visual check of the procedure's performance by observing the reconstruction and the phase lines after the procedure concludes, in order to approve or deny the wave analysis result. The final inspection ensures that it is a wave. We believe it is unwise to use the results from extensive data sets, which retrieve numerous wave parameters, without validating the results. We have enhanced the discussion section on this matter; the user now receives the best results and quality automatically, without the need to spend time selecting the area where the wave is, relying solely on their own judgment for the analysis. Furthermore, while we could utilize a machine learning-based program to automatically select the waves, this depends on large data sets of validated results that do not yet exist, primarily due to the limited number of medium-scale gravity wave analyses conducted so far. (ML programs have been employed to identify clear sky nights, for which we have extensive validated observations, and they are quite helpful). The suggestion regarding the Euclidean norm is quite good, and we may implement it in the future; for now, the program has demonstrated excellent performance in its current state and represents a significant improvement in keograms analysis. Introducing another ad hoc parameter is not our intention, as we would need to repeat all the tests conducted in this work and lack a consolidated physical meaning for it, unlike the linearity of the phase lines. We refer to lines 134-138, where we explain the assumption made, which is further supported by Figure 10.

**5. Validation against whole images.** Table 2 shows the parameters of some retrieved waves. Those waves have wavelengths that are generally similar, or smaller, than the spatial extent of the airglow image ( $512 \times 512$  km). Would it not be possible to verify some of the image parameters obtained from keograms against the corresponding images? I understand that some of the images would be affected by the Milky Way and various other light sources, but would it not be possible to obtain at least some images, where the medium-scale waves discussed would be visible (perhaps after applying low-pass filter to suppress small scale structure)? I agree that keogram analysis has many advantages over this approach, but could individual images be useful at least for demonstrating that wave azimuth and wavelength were retrieved correctly? If this is indeed very difficult, maybe authors could have validated their new method against previous, more manual keogram-based wave analysis techniques?

The new version includes discussions, a comparison with the older method, and a highlight of how this new method has improved spectral analysis. The discussion is in lines 331-351.

### Minor/specific comments

1. L29: I do not understand this sentence. The geographic location and altitude of a particular satellite observation (which is typically meant by the term “geolocation”) can typically be determined pretty accurately. In particular, nadir-viewing satellite instruments (e.g. AIRS, AWE missions), offer similar geolocation accuracy as ground-based airglow imagers. Maybe the authors are talking about the spatial data coverage, and not geolocation here? Also, “local features and properties” is an extremely vague description given that methodology is the main topic of this paper! Authors should explain this statement in a lot more detail or remove it.

The paragraph was rewritten to clarify the argument that motivates the work (lines 27-37).

2. L106: “The peak identification procedure needs an equally dimensioned array”. Why is that? Is that a fundamental requirement of the method, or is this just needed for compatibility with some particular implementation, software library, etc.?

It is necessary for our particular procedure for peak estimation. Details of the procedure were included in the text (lines 181-191), as also required by Referee 1.

3. Figure 2: The color scale in this figure is not defined or explained anywhere. This must be fixed.

It is a simple grayscale weighted by the maximum and minimum values of the entire image. Since the airglow images are not calibrated, they depend on an arbitrary basis based on the integration time. The figure legend has been updated.

4. Figure 3: Percentage of what? Power spectrum is normalized with respect to what exactly?

Concerning the maximum value. The figure legend was updated.

5. Figure 4: Units for deviation are not given. Also, the choice of color scale is very unfortunate, as there is very little contrast for deviations between 0 and 15, hence only the negative phases of most waves are visible.

The image was completely rescaled to fit the detected amplitude of the wave. Unfortunately, this caused other signals to become saturated. We simply need to choose which one will be saturated, as the Milky Way is the strongest feature in airglow images.

6. Equation (5): while it is, of course, OK to refer the reader to the study by Xu for derivation of this equation, authors should explain clearly what  $C_f$  is and how it was used in this work.

The text was revised to include additional details (lines 209-211).

7. L216: "Waves for a broad spectrum of velocity propagate in all directions without apparent anisotropy. However, more waves are seen with zonal components preferentially in the eastward direction compared to the westward direction". In my understanding, the second sentence directly contradicts the first: more waves with zonal components in the eastward direction is anisotropy.

In our research field, we typically look for anisotropies related to background wind filtering patterns (see, e.g., Giongo et al., 2020), which is what we referred to there and in the presented figure. Besides the MSGW's present anisotropy, with most of the waves propagating to the east, we could not determine whether the eastward-propagating waves are the faster waves, which constitutes the wind filtering anisotropy. No wind filtering is detected because the waves travel much faster than the wind, so they could have propagated from the ground without being absorbed by the background.

### **Minor typos and suggestions**

This is a list of typos that I noticed and minor, mostly language related, suggestions. Point-by-point replies to these are not necessary.

[...]

The authors thank the Referee for the suggestions.
